# Supplementary figures and images for: Comparative Proteomics Analysis of Anisakis simplex s.s.—Evaluation of the Response of Invasive Larvae to Ivermectin
Source: MDPI journal article supplement (doi:10.3390/genes11060710), 2020-06-26

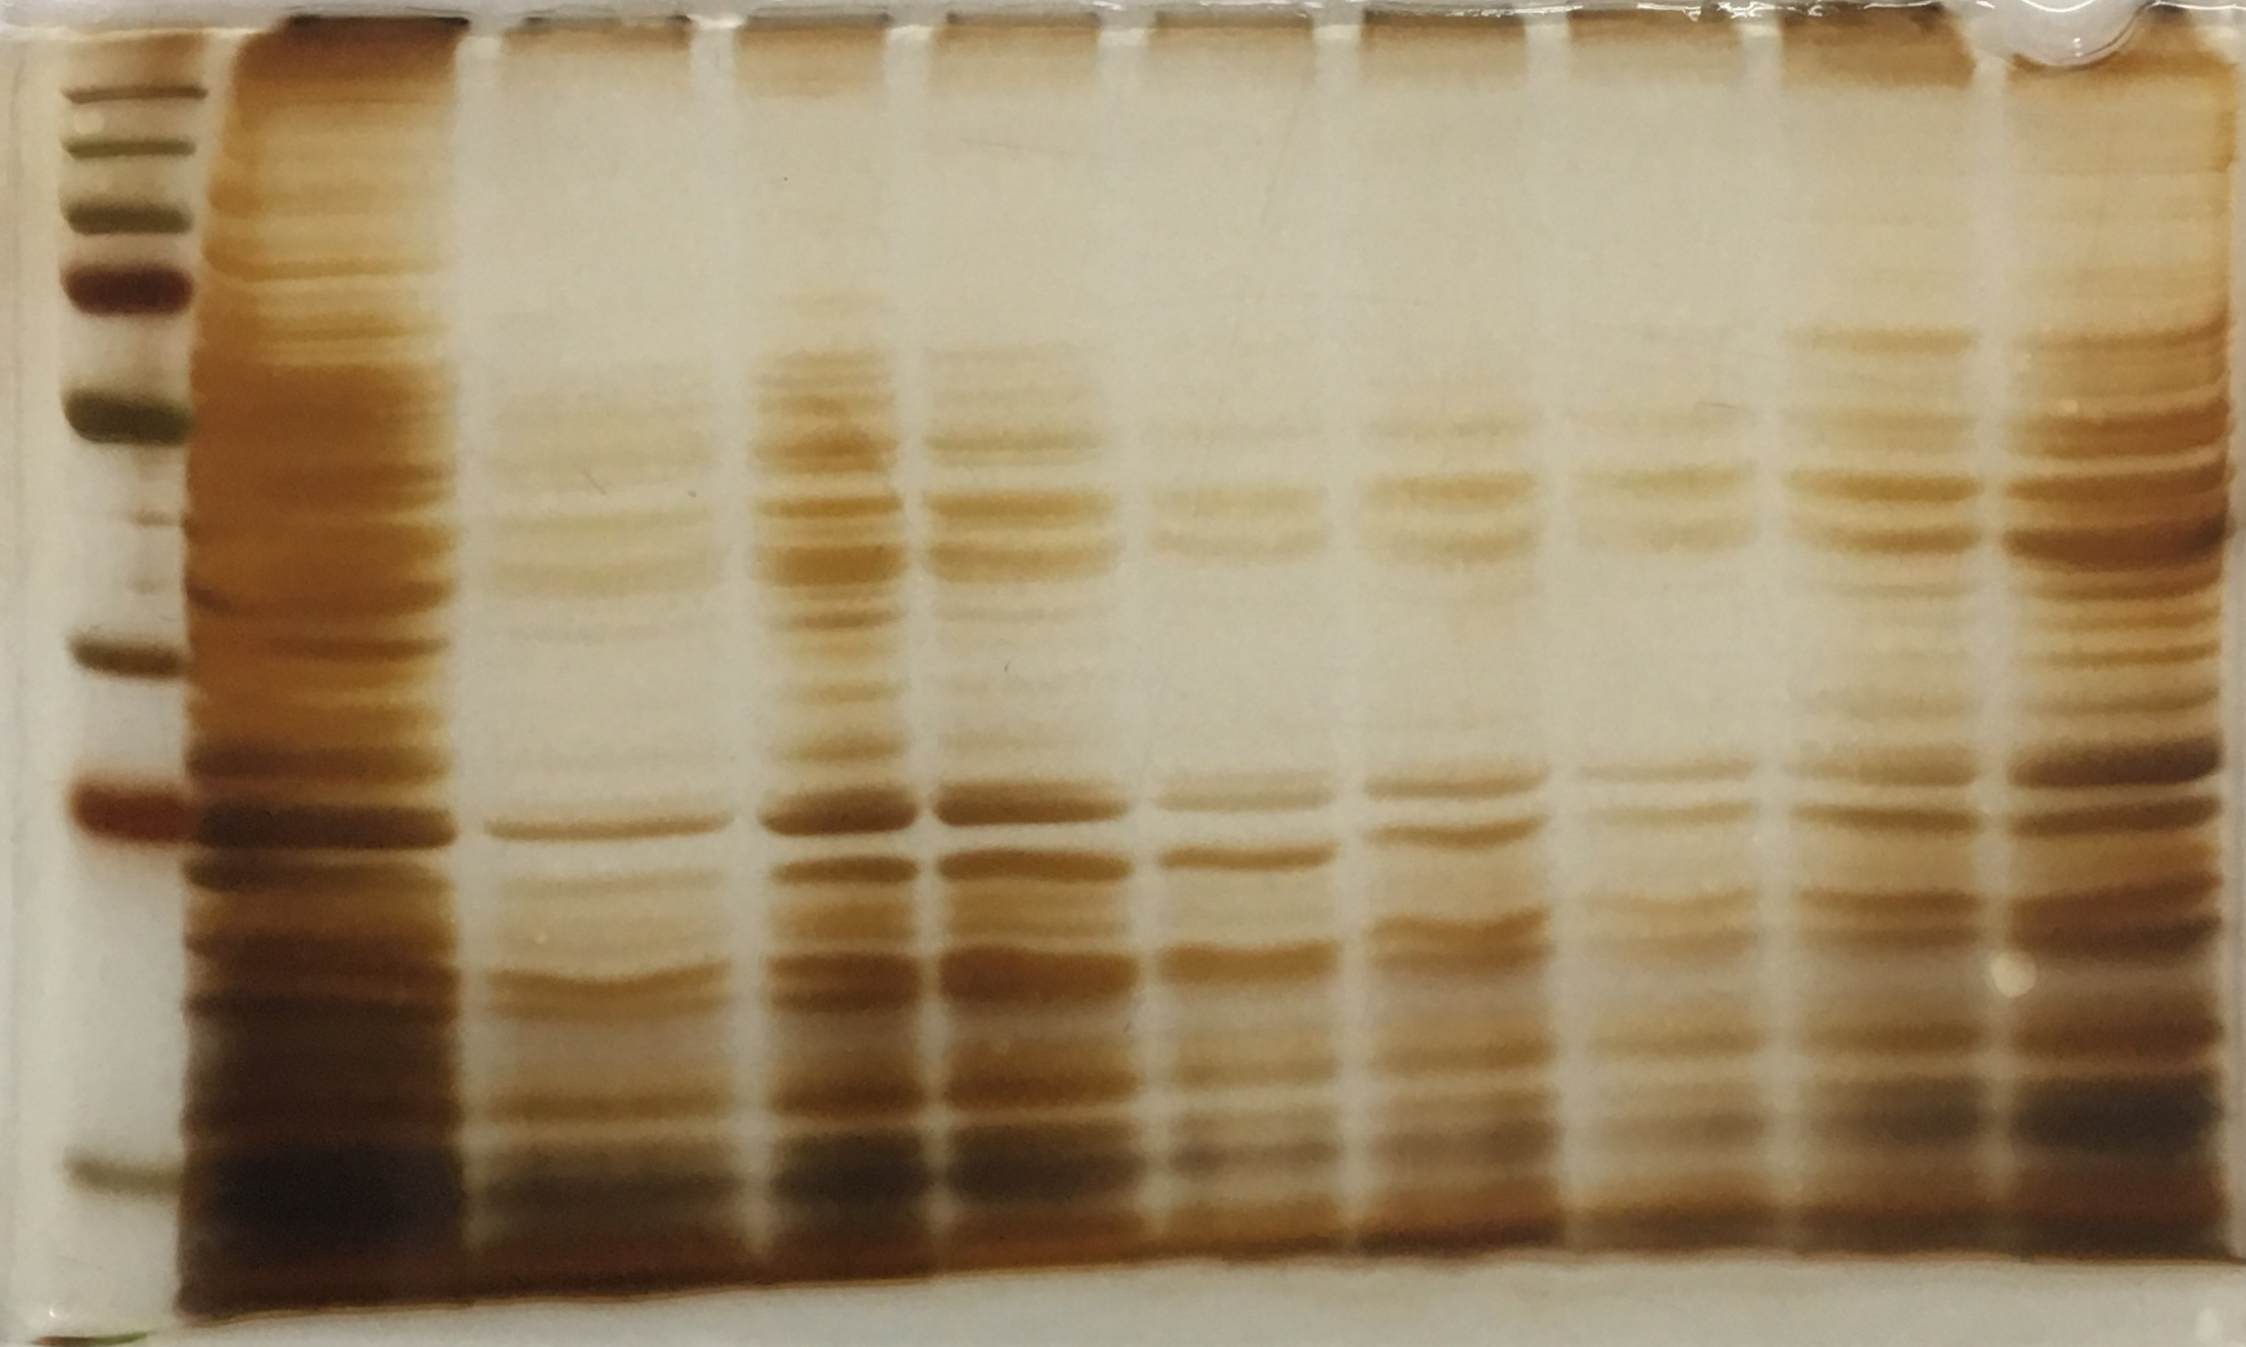

Supplement: s1 [file s1]
